# Supplementary material
Source: publisher site journal article supplement (https://www.spandidos-publications.com/6662/downloadSupplementary)
Supplement: Supplementary file 1 [file downloadSupplementary]

## Sheet: Fig2
Table SII. Raw data for cell growth, drug sensitivity, colony formation, cell migration, and cell invasion assays.
Cell growth assay after knockdwon Cul3
KKU-213A-FR
		OD-1	OD-2	OD-3	Average	SD	Fold-1	Fold-2	Fold-3	Average	SD
D0	siNC	0.0231	0.0311	0.0062	0.0201333	0.0127123	1.155	1.555	0.31	1.00667	0.635616
	siCul3#1	0.0366	0.0346	0.0376	0.0362667	0.00152753	1.01667	0.961111	1.04444	1.00741	0.0424313
	siCul3#2	0.0276	0.0326	0.0316	0.0306	0.00264575	0.890323	1.05161	1.01935	0.987097	0.0853468
D1	siNC	0.0442	0.0369	0.0379	0.0396667	0.00395769	2.21	1.845	1.895	1.98333	0.197885
	siCul3#1	0.0636	0.0696	0.0556	0.0629333	0.00702377	1.76667	1.93333	1.54444	1.74815	0.195105
	siCul3#2	0.0376	0.0376	0.0316	0.0356	0.0034641	1.2129	1.2129	1.01935	1.14839	0.111745
D2	siNC	0.0949	0.1068	0.103	0.101567	0.0060781	4.745	5.34	5.15	5.07833	0.303905
	siCul3#1	0.0706	0.0786	0.0816	0.0769333	0.00568624	1.96111	2.18333	2.26667	2.13704	0.157951
	siCul3#2	0.0456	0.0436	0.0456	0.0449333	0.0011547	1.47097	1.40645	1.47097	1.44946	0.0372484
D3	siNC	0.1322	0.1529	0.1407	0.141933	0.010405	6.61	7.645	7.035	7.09667	0.520248
	siCul3#1	0.1356	0.1566	0.1286	0.140267	0.0145717	3.76667	4.35	3.57222	3.8963	0.404768
	siCul3#2	0.0796	0.0846	0.0656	0.0766	0.00984886	2.56774	2.72903	2.11613	2.47097	0.317705
Cell growth assay after knockdwon Cul3
KKU-213A-GR
		OD-1	OD-2	OD-3	Average	SD	Fold-1	Fold-2	Fold-3	Average	SD
D0	siNC	0.0228	0.027	0.0262	0.0253333	0.0022301	0.912	1.08	1.048	1.01333	0.0892039
	siCul3#1	0.0331	0.0287	0.0341	0.0319667	0.00287286	1.03437	0.896875	1.06562	0.998958	0.0897769
	siCul3#2	0.0275	0.0331	0.0332	0.0312667	0.00326241	0.887097	1.06774	1.07097	1.0086	0.105239
D1	siNC	0.0491	0.0501	0.0423	0.0471667	0.00424421	1.964	2.004	1.692	1.88667	0.169768
	siCul3#1	0.0479	0.0488	0.0535	0.0500667	0.00300721	1.49688	1.525	1.67188	1.56458	0.0939754
	siCul3#2	0.0452	0.0419	0.0255	0.0375333	0.010551	1.45806	1.35161	0.822581	1.21075	0.340354
D2	siNC	0.0958	0.0897	0.1033	0.0962667	0.006812	3.832	3.588	4.132	3.85067	0.27248
	siCul3#1	0.0886	0.0871	0.0747	0.0834667	0.00762911	2.76875	2.72187	2.33437	2.60833	0.23841
	siCul3#2	0.0497	0.0377	0.0382	0.0418667	0.00678847	1.60323	1.21613	1.23226	1.35054	0.218983
D3	siNC	0.1355	0.1346	0.1326	0.134233	0.00148436	5.42	5.384	5.304	5.36933	0.0593745
	siCul3#1	0.1136	0.1162	0.1336	0.121133	0.0108744	3.55	3.63125	4.175	3.78542	0.339826
	siCul3#2	0.0872	0.0733	0.0692	0.0765667	0.00943416	2.8129	2.36452	2.23226	2.46989	0.304328
Drug sensitivity assay after knockdwon Cul3
KKU-213A-FR
	5-FU (ug/mL)	OD-1	OD-2	OD-3	Average	SD	%1	%2	%3	Average	SD
siNC	0	0.312	0.2949	0.2945	0.300467	0.00999016	104	98.3	98.1667	100.156	3.33005
	3.125	0.2874	0.2848	0.2999	0.2907	0.00807279	95.8	94.9333	99.9667	96.9	2.69093
	6.25	0.2111	0.2071	0.2004	0.2062	0.00540648	70.3667	69.0333	66.8	68.7333	1.80216
	12.5	0.1665	0.1611	0.1808	0.169467	0.0101796	55.5	53.7	60.2667	56.4889	3.39318
	25	0.1185	0.1029	0.1163	0.112567	0.00844354	39.5	34.3	38.7667	37.5222	2.81451
siCul3#1	0	0.4947	0.5136	0.4971	0.5018	0.0102893	98.5458	102.311	99.0239	99.9602	2.04966
	3.125	0.3511	0.3644	0.3742	0.363233	0.0115941	69.9402	72.5896	74.5418	72.3572	2.30958
	6.25	0.2404	0.2411	0.2123	0.231267	0.0164293	47.8884	48.0279	42.2908	46.0691	3.27278
	12.5	0.1759	0.1751	0.1717	0.174233	0.0022301	35.0398	34.8805	34.2032	34.7078	0.444242
	25	0.1021	0.1345	0.1057	0.1141	0.0177584	20.3386	26.7928	21.0558	22.7291	3.53753
siCul3#2	0	0.3221	0.3469	0.3572	0.342067	0.0180423	94.1813	101.433	104.444	100.019	5.27552
	3.125	0.2057	0.1698	0.1729	0.1828	0.0198925	60.1462	49.6491	50.5556	53.4503	5.81651
	6.25	0.09555	0.0968	0.1013	0.0978833	0.00302421	27.9386	28.3041	29.6199	28.6209	0.884271
	12.5	0.0662	0.0665	0.064	0.0655667	0.00136504	19.3567	19.4444	18.7135	19.1715	0.399134
	25	0.0537	0.0555	0.0595	0.0562333	0.00296873	15.7018	16.2281	17.3977	16.4425	0.868049
Drug sensitivity assay after knockdwon Cul3
KKU-213A-GR
	Gemcitabine (ug/mL)	OD-1	OD-2	OD-3	Average	SD	%1	%2	%3	Average	SD
siNC	0	0.3274	0.329	0.3184	0.324933	0.00571431	100.738	101.231	97.9692	99.9795	1.75825
	1.25	0.2885	0.2506	0.2983	0.279133	0.0251917	88.7692	77.1077	91.7846	85.8872	7.7513
	2.5	0.2239	0.2073	0.2072	0.2128	0.00961301	68.8923	63.7846	63.7538	65.4769	2.95785
	5	0.1758	0.1987	0.1873	0.187267	0.01145	54.0923	61.1385	57.6308	57.6205	3.52309
	10	0.1726	0.1554	0.1672	0.165067	0.00879621	53.1077	47.8154	51.4462	50.7897	2.70653
siCul3#1	0	0.4233	0.4203	0.3906	0.4114	0.0180757	102.993	102.263	95.0365	100.097	4.39797
	1.25	0.1953	0.2228	0.1763	0.198133	0.0233791	47.5182	54.2092	42.8954	48.2076	5.68835
	2.5	0.1689	0.1566	0.1436	0.156367	0.0126516	41.0949	38.1022	34.9392	38.0454	3.07825
	5	0.1439	0.1636	0.151	0.152833	0.00997714	35.0122	39.8054	36.7397	37.1857	2.42753
	10	0.123	0.1171	0.1104	0.116833	0.00630423	29.927	28.4915	26.8613	28.4266	1.53388
siCul3#2	0	0.37915	0.34265	0.34465	0.355483	0.0205203	106.803	96.5211	97.0845	100.136	5.78037
	1.25	0.14885	0.12625	0.11965	0.131583	0.0153132	41.9296	35.5634	33.7042	37.0657	4.31357
	2.5	0.11655	0.12515	0.13735	0.12635	0.0104518	32.831	35.2535	38.6901	35.5915	2.94417
	5	0.10705	0.10865	0.10275	0.10615	0.00305123	30.1549	30.6056	28.9437	29.9014	0.859501
	10	0.10865	0.09605	0.06625	0.0903167	0.0217737	30.6056	27.0563	18.662	25.4413	6.13343
Colony formation assay after knockdwon Cul3
KKU-213A-FR
		number of colony
		well 1	well 2	well 3	Average	SD
KKU-213A-FR	siNC	148	147	143	146	2.64575
	siCul3#1	98	102	86	95.3333	8.32666
	siCul3#2	55	54	67	58.6667	7.23418
KKU-213A-GR	siNC	123	136	126	128.333	6.80686
	siCul3#1	88	95	83	88.6667	6.02771
	siCul3#2	69	68	71	69.3333	1.52753
Cell migration assay
		Field-1	Field-2	Field-3	Field-4	Field-5	Average	SD
KKU-213A-FR	siNC	309	305	270	310	261	291	23.569
	siCul3#1	103	141	109	126	117	119.2	14.9399
	siCul3#2	114	134	163	126	168	141	23.5372
KKU-213A-GR	siNC	246	265	276	254	271	262.4	12.3004
	siCul3#1	107	117	83	102	97	101.2	12.5778
	siCul3#2	139	159	123	120	118	131.8	17.3118
Cell Invasion assay
		Field-1	Field-2	Field-3	Field-4	Field-5	Average	SD
KKU-213A-FR	siNC	508	524	497	505	505	507.8	9.93479
	siCul3#1	278	257	194	192	217	227.6	38.4487
	siCul3#2	384	373	321	275	400	350.6	51.5975
KKU-213A-GR	siNC	576	601	590	573	642	596.4	27.8622
	siCul3#1	268	216	242	228	236	238	19.3907
	siCul3#2	295	202	286	235	250	253.6	38.0303

## Sheet: ANOVA-post hoc Fig2A
Drug sensitivity assay after knockdwon Cul3														Drug sensitivity assay after knockdwon Cul3
KKU-213A-FR														KKU-213A-GR
	5-FU (ug/mL)	OD-1	OD-2	OD-3	Average	SD	%1	%2	%3	Average	SD	p value			Gemcitabine (ug/mL)	OD-1	OD-2	OD-3	Average	SD	%1	%2	%3	Average	SD	p value
siNC	0	0.312	0.2949	0.2945	0.300467	0.00999016	104	98.3	98.1667	100.156	3.33005			siNC	0	0.3274	0.329	0.3184	0.324933	0.00571431	100.738	101.231	97.9692	99.9795	1.75825
	3.125	0.2874	0.2848	0.2999	0.2907	0.00807279	95.8	94.9333	99.9667	96.9	2.69093				1.25	0.2885	0.2506	0.2983	0.279133	0.0251917	88.7692	77.1077	91.7846	85.8872	7.7513
	6.25	0.2111	0.2071	0.2004	0.2062	0.00540648	70.3667	69.0333	66.8	68.7333	1.80216				2.5	0.2239	0.2073	0.2072	0.2128	0.00961301	68.8923	63.7846	63.7538	65.4769	2.95785
	12.5	0.1665	0.1611	0.1808	0.169467	0.0101796	55.5	53.7	60.2667	56.4889	3.39318				5	0.1758	0.1987	0.1873	0.187267	0.01145	54.0923	61.1385	57.6308	57.6205	3.52309
	25	0.1185	0.1029	0.1163	0.112567	0.00844354	39.5	34.3	38.7667	37.5222	2.81451				10	0.1726	0.1554	0.1672	0.165067	0.00879621	53.1077	47.8154	51.4462	50.7897	2.70653
siCul3#1	0	0.4947	0.5136	0.4971	0.5018	0.0102893	98.5458	102.311	99.0239	99.9602	2.04966			siCul3#1	0	0.4233	0.4203	0.3906	0.4114	0.0180757	102.993	102.263	95.0365	100.097	4.39797
	3.125	0.3511	0.3644	0.3742	0.363233	0.0115941	69.9402	72.5896	74.5418	72.3572	2.30958	0.000277566			1.25	0.1953	0.2228	0.1763	0.198133	0.0233791	47.5182	54.2092	42.8954	48.2076	5.68835	0.00245948	**
	6.25	0.2404	0.2411	0.2123	0.231267	0.0164293	47.8884	48.0279	42.2908	46.0691	3.27278	0.000463937			2.5	0.1689	0.1566	0.1436	0.156367	0.0126516	41.0949	38.1022	34.9392	38.0454	3.07825	0.000370853	***
	12.5	0.1759	0.1751	0.1717	0.174233	0.0022301	35.0398	34.8805	34.2032	34.7078	0.444242	0.000384884			5	0.1439	0.1636	0.151	0.152833	0.00997714	35.0122	39.8054	36.7397	37.1857	2.42753	0.00116521	**
	25	0.1021	0.1345	0.1057	0.1141	0.0177584	20.3386	26.7928	21.0558	22.7291	3.53753	0.00477852			10	0.123	0.1171	0.1104	0.116833	0.00630423	29.927	28.4915	26.8613	28.4266	1.53388	0.000239279	***
siCul3#2	0	0.3221	0.3469	0.3572	0.342067	0.0180423	94.1813	101.433	104.444	100.019	5.27552			siCul3#2	0	0.37915	0.34265	0.34465	0.355483	0.0205203	106.803	96.5211	97.0845	100.136	5.78037
	3.125	0.2057	0.1698	0.1729	0.1828	0.0198925	60.1462	49.6491	50.5556	53.4503	5.81651	0.000300858			1.25	0.14885	0.12625	0.11965	0.131583	0.0153132	41.9296	35.5634	33.7042	37.0657	4.31357	0.000676226	***
	6.25	0.09555	0.0968	0.1013	0.0978833	0.00302421	27.9386	28.3041	29.6199	28.6209	0.884271	4.1584e-06			2.5	0.11655	0.12515	0.13735	0.12635	0.0104518	32.831	35.2535	38.6901	35.5915	2.94417	0.000242902	***
	12.5	0.0662	0.0665	0.064	0.0655667	0.00136504	19.3567	19.4444	18.7135	19.1715	0.399134	4.59817e-05			5	0.10705	0.10865	0.10275	0.10615	0.00305123	30.1549	30.6056	28.9437	29.9014	0.859501	0.000188088	***
	25	0.0537	0.0555	0.0595	0.0562333	0.00296873	15.7018	16.2281	17.3977	16.4425	0.868049	0.000243431			10	0.10865	0.09605	0.06625	0.0903167	0.0217737	30.6056	27.0563	18.662	25.4413	6.13343	0.00281055	**
Statistic analysis														Statistic analysis
Descriptives (Fold)														Descriptives (Fold)
		N	Mean	Std. Deviation	Std. Error	95% Confidence Interval for Mean		Minimum	Maximum							N	Mean	Std. Deviation	Std. Error	95% Confidence Interval for Mean		Minimum	Maximum
						Lower Bound	Upper Bound													Lower Bound	Upper Bound
conc0	siNC	3	100.156	3.33005	1.92261	91.8832	108.428	98.1667	104					conc0	siNC	3	99.9795	1.75825	1.01513	95.6118	104.347	97.9692	101.231
	siCul3#1	3	99.9602	2.04966	1.18337	94.8685	105.052	98.5458	102.311						siCul3#1	3	100.097	4.39797	2.53917	89.1721	111.022	95.0365	102.993
	siCul3#2	3	100.019	5.27552	3.04582	86.9144	113.125	94.1813	104.444						siCul3#2	3	100.136	5.78037	3.3373	85.7769	114.495	96.5211	106.803
	Total	9	100.045	3.28449	1.09483	97.5204	102.57	94.1813	104.444						Total	9	100.071	3.73719	1.24573	97.1983	102.944	95.0365	106.803
conc3.125	siNC	3	96.9	2.69093	1.55361	90.2154	103.585	94.9333	99.9667					conc3.125	siNC	3	85.8872	7.7513	4.47522	66.6319	105.142	77.1077	91.7846
	siCul3#1	3	72.3572	2.30958	1.33344	66.6199	78.0946	69.9402	74.5418						siCul3#1	3	48.2076	5.68835	3.28417	34.077	62.3383	42.8954	54.2092
	siCul3#2	3	53.4503	5.81651	3.35816	39.0013	67.8993	49.6491	60.1462						siCul3#2	3	37.0657	4.31357	2.49044	26.3502	47.7812	33.7042	41.9296
	Total	9	74.2358	19.172	6.39065	59.499	88.9727	49.6491	99.9667						Total	9	57.0535	22.7748	7.59159	39.5473	74.5597	33.7042	91.7846
conc6.25	siNC	3	68.7333	1.80216	1.04048	64.2565	73.2101	66.8	70.3667					conc6.25	siNC	3	65.4769	2.95785	1.70772	58.1292	72.8246	63.7538	68.8923
	siCul3#1	3	46.0691	3.27278	1.88954	37.939	54.1991	42.2908	48.0279						siCul3#1	3	38.0454	3.07825	1.77723	30.3986	45.6922	34.9392	41.0949
	siCul3#2	3	28.6209	0.884271	0.510534	26.4242	30.8175	27.9386	29.6199						siCul3#2	3	35.5915	2.94417	1.69982	28.2778	42.9053	32.831	38.6901
	Total	9	47.8077	17.5236	5.84119	34.3379	61.2776	27.9386	70.3667						Total	9	46.3713	14.6006	4.86688	35.1483	57.5943	32.831	68.8923
conc12.5	siNC	3	56.4889	3.39318	1.95906	48.0598	64.918	53.7	60.2667					conc12.5	siNC	3	57.6205	3.52309	2.03406	48.8687	66.3723	54.0923	61.1385
	siCul3#1	3	34.7078	0.444242	0.256484	33.6043	35.8114	34.2032	35.0398						siCul3#1	3	37.1857	2.42753	1.40153	31.1554	43.216	35.0122	39.8054
	siCul3#2	3	19.1715	0.399134	0.23044	18.18	20.163	18.7135	19.4444						siCul3#2	3	29.9014	0.859501	0.496233	27.7663	32.0365	28.9437	30.6056
	Total	9	36.7894	16.3253	5.44176	24.2407	49.3381	18.7135	60.2667						Total	9	41.5692	12.6347	4.21156	31.8574	51.2811	28.9437	61.1385
conc25	siNC	3	37.5222	2.81451	1.62496	30.5306	44.5139	34.3	39.5					conc25	siNC	3	50.7897	2.70653	1.56261	44.0664	57.5131	47.8154	53.1077
	siCul3#1	3	22.7291	3.53753	2.04239	13.9414	31.5168	20.3386	26.7928						siCul3#1	3	28.4266	1.53388	0.885584	24.6162	32.237	26.8613	29.927
	siCul3#2	3	16.4425	0.868049	0.501168	14.2861	18.5988	15.7018	17.3977						siCul3#2	3	25.4413	6.13343	3.54114	10.205	40.6776	18.662	30.6056
	Total	9	25.5646	9.65072	3.21691	18.1464	32.9828	15.7018	39.5						Total	9	34.8859	12.4808	4.16026	25.2923	44.4795	18.662	53.1077
Tests of Homogeneity of Variances														Tests of Homogeneity of Variances
		Levene Statistic	df1	df2	Sig.											Levene Statistic	df1	df2	Sig.
conc0	Based on Mean	1.78481	2	6	0.246473									conc0	Based on Mean	3.47055	2	6	0.0996642
	Based on Median	0.408084	2	6	0.682076										Based on Median	0.267702	2	6	0.773814
	Based on Median and with adjusted df	0.408084	2	4.89424	0.685626										Based on Median and with adjusted df	0.267702	2	4	0.777836
	Based on trimmed mean	1.61396	2	6	0.274879										Based on trimmed mean	2.81921	2	6	0.137016
conc3.125	Based on Mean	3.3479	2	6	0.105554									conc3.125	Based on Mean	0.816492	2	6	0.485703
	Based on Median	0.310716	2	6	0.744043										Based on Median	0.176197	2	6	0.842638
	Based on Median and with adjusted df	0.310716	2	2.97184	0.754161										Based on Median and with adjusted df	0.176197	2	4.37842	0.844116
	Based on trimmed mean	2.83763	2	6	0.135723										Based on trimmed mean	0.744322	2	6	0.514333
conc6.25	Based on Mean	3.87062	2	6	0.0832485									conc6.25	Based on Mean	0.0207961	2	6	0.979489
	Based on Median	0.345716	2	6	0.720936										Based on Median	0.0183354	2	6	0.981886
	Based on Median and with adjusted df	0.345716	2	2.68714	0.735176										Based on Median and with adjusted df	0.0183354	2	4.71771	0.981901
	Based on trimmed mean	3.26902	2	6	0.109589										Based on trimmed mean	0.015025	2	6	0.985124
conc12.5	Based on Mean	7.08142	2	6	0.0263511									conc12.5	Based on Mean	1.22271	2	6	0.358583
	Based on Median	1.84577	2	6	0.237288										Based on Median	1.06357	2	6	0.402385
	Based on Median and with adjusted df	1.84577	2	2.17225	0.340086										Based on Median and with adjusted df	1.06357	2	4.13834	0.423921
	Based on trimmed mean	6.51095	2	6	0.0313828										Based on trimmed mean	1.21545	2	6	0.360439
conc25	Based on Mean	3.90259	2	6	0.0820971									conc25	Based on Mean	3.18864	2	6	0.113914
	Based on Median	0.383679	2	6	0.696942										Based on Median	0.976371	2	6	0.42944
	Based on Median and with adjusted df	0.383679	2	3.91062	0.704454										Based on Median and with adjusted df	0.976371	2	2.92222	0.47343
	Based on trimmed mean	3.27551	2	6	0.109249										Based on trimmed mean	2.97669	2	6	0.126468
ANOVA														ANOVA
		Sum of Squares	df	Mean Square	F	Sig.										Sum of Squares	df	Mean Square	F	Sig.
conc0	Between Groups	0.0602131	2	0.0301066	0.00209454	0.997908								conc0	Between Groups	0.0399363	2	0.0199681	0.00107267	0.998928
	Within Groups	86.2429	6	14.3738											Within Groups	111.693	6	18.6154
	Total	86.3031	8												Total	111.733	8
conc3.125	Between Groups	2847.7	2	1423.85	92.0452	3.14466e-05								conc1.25	Between Groups	3927.42	2	1963.71	53.0509	0.000153326
	Within Groups	92.8141	6	15.469											Within Groups	222.094	6	37.0156
	Total	2940.51	8												Total	4149.52	8
conc6.25	Between Groups	2427.12	2	1213.56	246.98	1.72841e-06								conc2.5	Between Groups	1651.64	2	825.822	92.1244	3.13681e-05
	Within Groups	29.4816	6	4.9136											Within Groups	53.7853	6	8.96421
	Total	2456.6	8												Total	1705.43	8
conc12.5	Between Groups	2108.38	2	1054.19	266.425	1.38054e-06								conc5	Between Groups	1238.99	2	619.495	97.5901	2.65276e-05
	Within Groups	23.7407	6	3.95679											Within Groups	38.0876	6	6.34793
	Total	2132.12	8												Total	1277.08	8
conc25	Between Groups	702.713	2	351.357	49.7459	0.000183992								conc10	Between Groups	1151.56	2	575.782	36.5212	0.000437393
	Within Groups	42.3782	6	7.06303											Within Groups	94.5941	6	15.7657
	Total	745.091	8												Total	1246.16	8
Post Hoc Tests														Post Hoc Tests
Multiple Comparisons														Multiple Comparisons
Scheffe														Scheffe
Dependent Variable	(I) KnockdownCul3	(J) KnockdownCul3	Mean Difference (I-J)	Std. Error	Sig.	95% Confidence Interval								Dependent Variable	(I) KnockdownCul3	(J) KnockdownCul3	Mean Difference (I-J)	Std. Error	Sig.	95% Confidence Interval
						Lower Bound	Upper Bound													Lower Bound	Upper Bound
conc0	siNC	siCul3#1	0.195396	3.09557	0.99801	-9.73289	10.1237							conc0	siNC	siCul3#1	-0.117836	3.52282	0.999441	-11.4164	11.1808
		siCul3#2	0.136062	3.09557	0.999035	-9.79223	10.0644									siCul3#2	-0.156663	3.52282	0.999012	-11.4553	11.1419
	siCul3#1	siNC	-0.195396	3.09557	0.99801	-10.1237	9.73289								siCul3#1	siNC	0.117836	3.52282	0.999441	-11.1808	11.4164
		siCul3#2	-0.0593338	3.09557	0.999816	-9.98762	9.86895									siCul3#2	-0.0388267	3.52282	0.999939	-11.3374	11.2598
	siCul3#2	siNC	-0.136062	3.09557	0.999035	-10.0644	9.79223								siCul3#2	siNC	0.156663	3.52282	0.999012	-11.1419	11.4553
		siCul3#1	0.0593338	3.09557	0.999816	-9.86895	9.98762									siCul3#1	0.0388267	3.52282	0.999939	-11.2598	11.3374
conc3.125	siNC	siCul3#1	24.5427623*	3.21134	0.0008084	14.2432	34.8423	***						conc1.25	siNC	siCul3#1	37.6795558*	4.9676	0.000842275	21.7472	53.6119	***
		siCul3#2	43.4497076*	3.21134	3.19617e-05	33.1501	53.7493	***								siCul3#2	48.8214518*	4.9676	0.000200056	32.8891	64.7538	***
	siCul3#1	siNC	-24.5427623*	3.21134	0.0008084	-34.8423	-14.2432								siCul3#1	siNC	-37.6795558*	4.9676	0.000842275	-53.6119	-21.7472
		siCul3#2	18.9069453*	3.21134	0.0032125	8.60736	29.2065	**								siCul3#2	11.1419	4.9676	0.160935	-4.79049	27.0743	ns
	siCul3#2	siNC	-43.4497076*	3.21134	3.19617e-05	-53.7493	-33.1501								siCul3#2	siNC	-48.8214518*	4.9676	0.000200056	-64.7538	-32.8891
		siCul3#1	-18.9069453*	3.21134	0.0032125	-29.2065	-8.60736									siCul3#1	-11.1419	4.9676	0.160935	-27.0743	4.79049
conc6.25	siNC	siCul3#1	22.6642762*	1.8099	5.00501e-05	16.8595	28.4691	***						conc2.5	siNC	siCul3#1	27.4315054*	2.44461	9.40954e-05	19.591	35.272	***
		siCul3#2	40.1124756*	1.8099	1.75745e-06	34.3077	45.9173	***								siCul3#2	29.8853738*	2.44461	5.75015e-05	22.0449	37.7259	***
	siCul3#1	siNC	-22.6642762*	1.8099	5.00501e-05	-28.4691	-16.8595								siCul3#1	siNC	-27.4315054*	2.44461	9.40954e-05	-35.272	-19.591
		siCul3#2	17.4481994*	1.8099	0.000223031	11.6434	23.253	***								siCul3#2	2.45387	2.44461	0.627695	-5.38664	10.2944	ns
	siCul3#2	siNC	-40.1124756*	1.8099	1.75745e-06	-45.9173	-34.3077								siCul3#2	siNC	-29.8853738*	2.44461	5.75015e-05	-37.7259	-22.0449
		siCul3#1	-17.4481994*	1.8099	0.000223031	-23.253	-11.6434									siCul3#1	-2.45387	2.44461	0.627695	-10.2944	5.38664
conc12.5	siNC	siCul3#1	21.7810536*	1.62415	3.36495e-05	16.572	26.9901	***						conc5	siNC	siCul3#1	20.4347869*	2.05717	0.000188342	13.8369	27.0327	***
		siCul3#2	37.3173489*	1.62415	1.41912e-06	32.1083	42.5264	***								siCul3#2	27.7191044*	2.05717	3.27371e-05	21.1212	34.317	***
	siCul3#1	siNC	-21.7810536*	1.62415	3.36495e-05	-26.9901	-16.572								siCul3#1	siNC	-20.4347869*	2.05717	0.000188342	-27.0327	-13.8369
		siCul3#2	15.5362954*	1.62415	0.000233011	10.3272	20.7454	***								siCul3#2	7.2843174*	2.05717	0.0339037	0.686439	13.8822	*
	siCul3#2	siNC	-37.3173489*	1.62415	1.41912e-06	-42.5264	-32.1083								siCul3#2	siNC	-27.7191044*	2.05717	3.27371e-05	-34.317	-21.1212
		siCul3#1	-15.5362954*	1.62415	0.000233011	-20.7454	-10.3272									siCul3#1	-7.2843174*	2.05717	0.0339037	-13.8822	-0.686439
conc25	siNC	siCul3#1	14.7931386*	2.16995	0.00149483	7.83355	21.7527	**						conc10	siNC	siCul3#1	22.3631418*	3.24198	0.00140408	11.9653	32.761	**
		siCul3#2	21.0797271*	2.16995	0.000213625	14.1201	28.0393	***								siCul3#2	25.3484290*	3.24198	0.000713892	14.9506	35.7463	***
	siCul3#1	siNC	-14.7931386*	2.16995	0.00149483	-21.7527	-7.83355								siCul3#1	siNC	-22.3631418*	3.24198	0.00140408	-32.761	-11.9653
		siCul3#2	6.28659	2.16995	0.0724397	-0.673002	13.2462	ns								siCul3#2	2.98529	3.24198	0.672635	-7.41259	13.3832	ns
	siCul3#2	siNC	-21.0797271*	2.16995	0.000213625	-28.0393	-14.1201								siCul3#2	siNC	-25.3484290*	3.24198	0.000713892	-35.7463	-14.9506
		siCul3#1	-6.28659	2.16995	0.0724397	-13.2462	0.673002									siCul3#1	-2.98529	3.24198	0.672635	-13.3832	7.41259
*. The mean difference is significant at the 0.05 level.														*. The mean difference is significant at the 0.05 level.
Homogeneous Subsets
														conc0
conc0														Scheffea
Scheffea														KnockdownCul3	N	Subset for alpha = 0.05
KnockdownCul3	N	Subset for alpha = 0.05														1
		1												siNC	3	99.9795
siCul3#1	3	99.9602												siCul3#1	3	100.097
siCul3#2	3	100.019												siCul3#2	3	100.136
siNC	3	100.156												Sig.		0.999012
Sig.		0.99801												Means for groups in homogeneous subsets are displayed.
Means for groups in homogeneous subsets are displayed.														a. Uses Harmonic Mean Sample Size = 3.000.
a. Uses Harmonic Mean Sample Size = 3.000.
														conc1.25
conc3.125														Scheffea
Scheffea														KnockdownCul3	N	Subset for alpha = 0.05
KnockdownCul3	N	Subset for alpha = 0.05														1	2
		1	2	3										siCul3#2	3	37.0657
siCul3#2	3	53.4503												siCul3#1	3	48.2076
siCul3#1	3		72.3572											siNC	3		85.8872
siNC	3			96.9										Sig.		0.160935	1
Sig.		1	1	1										Means for groups in homogeneous subsets are displayed.
Means for groups in homogeneous subsets are displayed.														a. Uses Harmonic Mean Sample Size = 3.000.
a. Uses Harmonic Mean Sample Size = 3.000.
														conc2.5
conc6.25														Scheffea
Scheffea														KnockdownCul3	N	Subset for alpha = 0.05
KnockdownCul3	N	Subset for alpha = 0.05														1	2
		1	2	3										siCul3#2	3	35.5915
siCul3#2	3	28.6209												siCul3#1	3	38.0454
siCul3#1	3		46.0691											siNC	3		65.4769
siNC	3			68.7333										Sig.		0.627695	1
Sig.		1	1	1										Means for groups in homogeneous subsets are displayed.
Means for groups in homogeneous subsets are displayed.														a. Uses Harmonic Mean Sample Size = 3.000.
a. Uses Harmonic Mean Sample Size = 3.000.
														conc5
conc12.5														Scheffea
Scheffea														KnockdownCul3	N	Subset for alpha = 0.05
KnockdownCul3	N	Subset for alpha = 0.05														1	2	3
		1	2	3										siCul3#2	3	29.9014
siCul3#2	3	19.1715												siCul3#1	3		37.1857
siCul3#1	3		34.7078											siNC	3			57.6205
siNC	3			56.4889										Sig.		1	1	1
Sig.		1	1	1										Means for groups in homogeneous subsets are displayed.
Means for groups in homogeneous subsets are displayed.														a. Uses Harmonic Mean Sample Size = 3.000.
a. Uses Harmonic Mean Sample Size = 3.000.
														conc10
conc25														Scheffea
Scheffea														KnockdownCul3	N	Subset for alpha = 0.05
KnockdownCul3	N	Subset for alpha = 0.05														1	2
		1	2											siCul3#2	3	25.4413
siCul3#2	3	16.4425												siCul3#1	3	28.4266
siCul3#1	3	22.7291												siNC	3		50.7897
siNC	3		37.5222											Sig.		0.672635	1
Sig.		0.0724397	1											Means for groups in homogeneous subsets are displayed.
Means for groups in homogeneous subsets are displayed.														a. Uses Harmonic Mean Sample Size = 3.000.
a. Uses Harmonic Mean Sample Size = 3.000.														a. Uses Harmonic Mean Sample Size = 3.000.

## Sheet: ANOVA-post hoc Fig2B
Cell growth assay after knockdwon Cul3														Cell growth assay after knockdwon Cul3
KKU-213A-FR														KKU-213A-GR
		OD-1	OD-2	OD-3	Average	SD	Fold-1	Fold-2	Fold-3	Average	SD	p value				OD-1	OD-2	OD-3	Average	SD	Fold-1	Fold-2	Fold-3	Average	SD	p value
D0	siNC	0.0231	0.0311	0.0062	0.0201333	0.0127123	1.155	1.555	0.31	1.00667	0.635616			D0	siNC	0.0228	0.027	0.0262	0.0253333	0.0022301	0.912	1.08	1.048	1.01333	0.0892039
	siCul3#1	0.0366	0.0346	0.0376	0.0362667	0.00152753	1.01667	0.961111	1.04444	1.00741	0.0424313				siCul3#1	0.0331	0.0287	0.0341	0.0319667	0.00287286	1.03437	0.896875	1.06562	0.998958	0.0897769
	siCul3#2	0.0276	0.0326	0.0316	0.0306	0.00264575	0.890323	1.05161	1.01935	0.987097	0.0853468				siCul3#2	0.0275	0.0331	0.0332	0.0312667	0.00326241	0.887097	1.06774	1.07097	1.0086	0.105239
D1	siNC	0.0442	0.0369	0.0379	0.0396667	0.00395769	2.21	1.845	1.895	1.98333	0.197885			D1	siNC	0.0491	0.0501	0.0423	0.0471667	0.00424421	1.964	2.004	1.692	1.88667	0.169768
	siCul3#1	0.0636	0.0696	0.0556	0.0629333	0.00702377	1.76667	1.93333	1.54444	1.74815	0.195105	0.216563			siCul3#1	0.0479	0.0488	0.0535	0.0500667	0.00300721	1.49688	1.525	1.67188	1.56458	0.0939754	0.0452423	*
	siCul3#2	0.0376	0.0376	0.0316	0.0356	0.0034641	1.2129	1.2129	1.01935	1.14839	0.111745	0.00312623			siCul3#2	0.0452	0.0419	0.0255	0.0375333	0.010551	1.45806	1.35161	0.822581	1.21075	0.340354	0.0370021	**
D2	siNC	0.0949	0.1068	0.103	0.101567	0.0060781	4.745	5.34	5.15	5.07833	0.303905			D2	siNC	0.0958	0.0897	0.1033	0.0962667	0.006812	3.832	3.588	4.132	3.85067	0.27248
	siCul3#1	0.0706	0.0786	0.0816	0.0769333	0.00568624	1.96111	2.18333	2.26667	2.13704	0.157951	0.000118967			siCul3#1	0.0886	0.0871	0.0747	0.0834667	0.00762911	2.76875	2.72187	2.33437	2.60833	0.23841	0.00402008	**
	siCul3#2	0.0456	0.0436	0.0456	0.0449333	0.0011547	1.47097	1.40645	1.47097	1.44946	0.0372484	3.32573e-05			siCul3#2	0.0497	0.0377	0.0382	0.0418667	0.00678847	1.60323	1.21613	1.23226	1.35054	0.218983	0.000244094	***
D3	siNC	0.1322	0.1529	0.1407	0.141933	0.010405	6.61	7.645	7.035	7.09667	0.520248			D3	siNC	0.1355	0.1346	0.1326	0.134233	0.00148436	5.42	5.384	5.304	5.36933	0.0593745
	siCul3#1	0.1356	0.1566	0.1286	0.140267	0.0145717	3.76667	4.35	3.57222	3.8963	0.404768	0.00109448			siCul3#1	0.1136	0.1162	0.1336	0.121133	0.0108744	3.55	3.63125	4.175	3.78542	0.339826	0.00135418	**
	siCul3#2	0.0796	0.0846	0.0656	0.0766	0.00984886	2.56774	2.72903	2.11613	2.47097	0.317705	0.000193536			siCul3#2	0.0872	0.0733	0.0692	0.0765667	0.00943416	2.8129	2.36452	2.23226	2.46989	0.304328	8.50176e-05	***
Statistic analysis														Statistic analysis
Descriptives														Descriptives
		N	Mean	Std. Deviation	Std. Error	95% Confidence Interval for Mean		Minimum	Maximum							N	Mean	Std. Deviation	Std. Error	95% Confidence Interval for Mean		Minimum	Maximum
						Lower Bound	Upper Bound													Lower Bound	Upper Bound
Day0	SiNC	3	1.00667	0.635616	0.366973	-0.572292	2.58563	0.31	1.555					Day0	SiNC	3	1.01333	0.0892039	0.0515019	0.791739	1.23493	0.912	1.08
	SiCul3#1	3	1.00733	0.042336	0.0244427	0.902165	1.1125	0.961	1.044						SiCul3#1	3	0.999	0.0897719	0.0518298	0.775994	1.22201	0.897	1.066
	SiCul3#2	3	0.987	0.0856096	0.0494267	0.774334	1.19967	0.89	1.052						SiCul3#2	3	1.00867	0.105377	0.0608395	0.746895	1.27044	0.887	1.071
	Total	9	1.00033	0.321531	0.107177	0.753182	1.24748	0.31	1.555						Total	9	1.007	0.0825848	0.0275283	0.94352	1.07048	0.887	1.08
Day1	SiNC	3	1.98333	0.197885	0.114249	1.49176	2.47491	1.845	2.21					Day1	SiNC	3	1.88667	0.169768	0.0980159	1.46494	2.30839	1.692	2.004
	SiCul3#1	3	1.748	0.195195	0.112696	1.26311	2.23289	1.544	1.933						SiCul3#1	3	1.56467	0.0940018	0.0542719	1.33115	1.79818	1.497	1.672
	SiCul3#2	3	1.14833	0.112006	0.0646667	0.870095	1.42657	1.019	1.213						SiCul3#2	3	1.214	0.33504	0.193436	0.381714	2.04629	0.832	1.458
	Total	9	1.62656	0.401842	0.133947	1.31767	1.93544	1.019	2.21						Total	9	1.55511	0.349813	0.116604	1.28622	1.824	0.832	2.004
Day2	SiNC	3	5.07833	0.303905	0.17546	4.32339	5.83328	4.745	5.34					Day2	SiNC	3	3.85067	0.27248	0.157316	3.17379	4.52754	3.588	4.132
	SiCul3#1	3	2.137	0.158101	0.0912798	1.74425	2.52975	1.961	2.267						SiCul3#1	3	2.60833	0.238739	0.137836	2.01527	3.20139	2.334	2.769
	SiCul3#2	3	1.44933	0.0375278	0.0216667	1.35611	1.54256	1.406	1.471						SiCul3#2	3	1.35033	0.218962	0.126418	0.806402	1.89426	1.216	1.603
	Total	9	2.88822	1.67822	0.559408	1.59822	4.17822	1.406	5.34						Total	9	2.60311	1.10318	0.367726	1.75513	3.45109	1.216	4.132
Day3	SiNC	3	7.09667	0.520248	0.300366	5.8043	8.38904	6.61	7.645					Day3	SiNC	3	5.36933	0.0593745	0.0342799	5.22184	5.51683	5.304	5.42
	SiCul3#1	3	3.89633	0.404804	0.233714	2.89074	4.90192	3.572	4.35						SiCul3#1	3	3.78533	0.339883	0.196231	2.94102	4.62965	3.55	4.175
	SiCul3#2	3	2.48767	0.28997	0.167414	1.76734	3.20799	2.166	2.729						SiCul3#2	3	2.47	0.304399	0.175745	1.71383	3.22617	2.232	2.813
	Total	9	4.49356	2.07685	0.692285	2.89714	6.08997	2.166	7.645						Total	9	3.87489	1.27812	0.42604	2.89244	4.85734	2.232	5.42
Tests of Homogeneity of Variances														Tests of Homogeneity of Variances
		Levene Statistic	df1	df2	Sig.											Levene Statistic	df1	df2	Sig.
Day0	Based on Mean	6.39363	2	6	0.0325735									Day0	Based on Mean	0.153803	2	6	0.860716
	Based on Median	2.29172	2	6	0.182211										Based on Median	0.00383734	2	6	0.996172
	Based on Median and with adjusted df	2.29172	2	2.11846	0.295255										Based on Median and with adjusted df	0.00383734	2	5.23787	0.996173
	Based on trimmed mean	6.0227	2	6	0.0367582										Based on trimmed mean	0.123758	2	6	0.885792
Day1	Based on Mean	0.622853	2	6	0.567821									Day1	Based on Mean	4.00213	2	6	0.0786454
	Based on Median	0.206989	2	6	0.818599										Based on Median	0.518205	2	6	0.620012
	Based on Median and with adjusted df	0.206989	2	5.14996	0.819476										Based on Median and with adjusted df	0.518205	2	3.43142	0.635829
	Based on trimmed mean	0.578766	2	6	0.589066										Based on trimmed mean	3.43892	2	6	0.101141
Day2	Based on Mean	3.69975	2	6	0.0897817									Day2	Based on Mean	0.0265226	2	6	0.97394
	Based on Median	1.2796	2	6	0.344473										Based on Median	0.05664	2	6	0.945433
	Based on Median and with adjusted df	1.2796	2	3.28168	0.388297										Based on Median and with adjusted df	0.05664	2	5.68619	0.94546
	Based on trimmed mean	3.47372	2	6	0.0995183										Based on trimmed mean	0.0286138	2	6	0.971923
Day3	Based on Mean	0.462994	2	6	0.650143									Day3	Based on Mean	4.21167	2	6	0.0719875
	Based on Median	0.246183	2	6	0.789305										Based on Median	0.565375	2	6	0.595728
	Based on Median and with adjusted df	0.246183	2	5.41546	0.790076										Based on Median and with adjusted df	0.565375	2	3.87115	0.608948
	Based on trimmed mean	0.446488	2	6	0.659528										Based on trimmed mean	3.6521	2	6	0.0917248
														ANOVA
ANOVA																Sum of Squares	df	Mean Square	F	Sig.
		Sum of Squares	df	Mean Square	F	Sig.								Day0	Between Groups	0.000320667	2	0.000160333	0.0177356	0.982472
Day0	Between Groups	0.000800667	2	0.000400333	0.00290708	0.997099									Within Groups	0.0542413	6	0.00904022
	Within Groups	0.826259	6	0.13771											Total	0.054562	8
	Total	0.82706	8											Day1	Between Groups	0.679132	2	0.339566	6.79541	0.0287274	*
Day1	Between Groups	1.11221	2	0.556103	18.5771	0.00268772	**								Within Groups	0.299819	6	0.0499699
	Within Groups	0.179609	6	0.0299349											Total	0.978951	8
	Total	1.29182	8											Day2	Between Groups	9.37762	2	4.68881	78.5019	4.98725e-05	***
Day2	Between Groups	22.294	2	11.147	281.578	1.17155e-06	***								Within Groups	0.358372	6	0.0597287
	Within Groups	0.237525	6	0.0395876											Total	9.73599	8
	Total	22.5315	8											Day3	Between Groups	12.6453	2	6.32265	89.5962	3.40082e-05	***
Day3	Between Groups	33.4694	2	16.7347	96.8055	2.71581e-05	***								Within Groups	0.423409	6	0.0705682
	Within Groups	1.03721	6	0.172869											Total	13.0687	8
	Total	34.5066	8
														Post Hoc Tests
Post Hoc Tests														Multiple Comparisons
														Scheffe
Multiple Comparisons														Dependent Variable	(I) KnockdownCul3	(J) KnockdownCul3	Mean Difference (I-J)	Std. Error	Sig.	95% Confidence Interval
Scheffe																				Lower Bound	Upper Bound
Dependent Variable: Fold	(I) KnockdownCul3	(J) KnockdownCul3	Mean Difference (I-J)	Std. Error	Sig.	95% Confidence Interval								Day0	SiNC	SiCul3#1	0.0143333	0.0776326	0.983148	-0.234654	0.263321
						Lower Bound	Upper Bound									SiCul3#2	0.00466667	0.0776326	0.998195	-0.244321	0.253654
Day0	SiNC	SiCul3#1	-0.000666667	0.302996	0.999998	-0.972453	0.97112								SiCul3#1	SiNC	-0.0143333	0.0776326	0.983148	-0.263321	0.234654
		SiCul3#2	0.0196667	0.302996	0.997896	-0.95212	0.991453									SiCul3#2	-0.00966667	0.0776326	0.992288	-0.258654	0.239321
	SiCul3#1	SiNC	0.000666667	0.302996	0.999998	-0.97112	0.972453								SiCul3#2	SiNC	-0.00466667	0.0776326	0.998195	-0.253654	0.244321
		SiCul3#2	0.0203333	0.302996	0.997752	-0.951453	0.99212									SiCul3#1	0.00966667	0.0776326	0.992288	-0.239321	0.258654
	SiCul3#2	SiNC	-0.0196667	0.302996	0.997896	-0.991453	0.95212							Day1	SiNC	SiCul3#1	0.322	0.182519	0.285467	-0.263386	0.907386	ns
		SiCul3#1	-0.0203333	0.302996	0.997752	-0.99212	0.951453									SiCul3#2	.67267*	0.182519	0.0287636	0.0872804	1.25805	*
Day1	SiNC	SiCul3#1	0.235333	0.141268	0.319665	-0.217749	0.688416	ns							SiCul3#1	SiNC	-0.322	0.182519	0.285467	-0.907386	0.263386
		SiCul3#2	.83500*	0.141268	0.0031485	0.381918	1.28808	**								SiCul3#2	0.350667	0.182519	0.23731	-0.23472	0.936053	ns
	SiCul3#1	SiNC	-0.235333	0.141268	0.319665	-0.688416	0.217749								SiCul3#2	SiNC	-.67267*	0.182519	0.0287636	-1.25805	-0.0872804
		SiCul3#2	.59967*	0.141268	0.0155877	0.146584	1.05275	*								SiCul3#1	-0.350667	0.182519	0.23731	-0.936053	0.23472
	SiCul3#2	SiNC	-.83500*	0.141268	0.0031485	-1.28808	-0.381918							Day2	SiNC	SiCul3#1	1.24233*	0.199547	0.00240869	0.602334	1.88233	**
		SiCul3#1	-.59967*	0.141268	0.0155877	-1.05275	-0.146584									SiCul3#2	2.50033*	0.199547	4.98744e-05	1.86033	3.14033	***
Day2	SiNC	SiCul3#1	2.94133*	0.162455	5.8071e-06	2.4203	3.46237	***							SiCul3#1	SiNC	-1.24233*	0.199547	0.00240869	-1.88233	-0.602334
		SiCul3#2	3.62900*	0.162455	1.67711e-06	3.10796	4.15004	***								SiCul3#2	1.25800*	0.199547	0.00225661	0.618	1.898	**
	SiCul3#1	SiNC	-2.94133*	0.162455	5.8071e-06	-3.46237	-2.4203								SiCul3#2	SiNC	-2.50033*	0.199547	4.98744e-05	-3.14033	-1.86033
		SiCul3#2	.68767*	0.162455	0.0157863	0.166631	1.2087	*								SiCul3#1	-1.25800*	0.199547	0.00225661	-1.898	-0.618
	SiCul3#2	SiNC	-3.62900*	0.162455	1.67711e-06	-4.15004	-3.10796							Day3	SiNC	SiCul3#1	1.58400*	0.2169	0.00103413	0.888347	2.27965	**
		SiCul3#1	-.68767*	0.162455	0.0157863	-1.2087	-0.166631									SiCul3#2	2.89933*	0.2169	3.42915e-05	2.20368	3.59499	***
Day3	SiNC	SiCul3#1	3.20033*	0.339479	0.000252953	2.11154	4.28913	***							SiCul3#1	SiNC	-1.58400*	0.2169	0.00103413	-2.27965	-0.888347
		SiCul3#2	4.60900*	0.339479	3.13297e-05	3.5202	5.6978	***								SiCul3#2	1.31533*	0.2169	0.00275982	0.61968	2.01099	**
	SiCul3#1	SiNC	-3.20033*	0.339479	0.000252953	-4.28913	-2.11154								SiCul3#2	SiNC	-2.89933*	0.2169	3.42915e-05	-3.59499	-2.20368
		SiCul3#2	1.40867*	0.339479	0.0172569	0.31987	2.49746	*								SiCul3#1	-1.31533*	0.2169	0.00275982	-2.01099	-0.61968
	SiCul3#2	SiNC	-4.60900*	0.339479	3.13297e-05	-5.6978	-3.5202							*. The mean difference is significant at the 0.05 level.
		SiCul3#1	-1.40867*	0.339479	0.0172569	-2.49746	-0.31987
*. The mean difference is significant at the 0.05 level.
														Homogeneous Subsets
Homogeneous Subsets														Day0
														Scheffea
Day0														KnockdownCul3	N	Subset for alpha = 0.05
Scheffea																1
KnockdownCul3	N	Subset for alpha = 0.05												SiCul3#1	3	0.999
		1												SiCul3#2	3	1.00867
SiCul3#2	3	0.987												SiNC	3	1.01333
SiNC	3	1.00667												Sig.		0.983148
SiCul3#1	3	1.00733												Means for groups in homogeneous subsets are displayed.
Sig.		0.997752												a. Uses Harmonic Mean Sample Size = 3.000.
Means for groups in homogeneous subsets are displayed.
a. Uses Harmonic Mean Sample Size = 3.000.														Day1
														Scheffea
Day1														KnockdownCul3	N	Subset for alpha = 0.05
Scheffea																1	2
KnockdownCul3	N	Subset for alpha = 0.05												SiCul3#2	3	1.214
		1	2											SiCul3#1	3	1.56467	1.56467
SiCul3#2	3	1.14833												SiNC	3		1.88667
SiCul3#1	3		1.748											Sig.		0.23731	0.285467
SiNC	3		1.98333											Means for groups in homogeneous subsets are displayed.
Sig.		1	0.319665											a. Uses Harmonic Mean Sample Size = 3.000.
Means for groups in homogeneous subsets are displayed.
a. Uses Harmonic Mean Sample Size = 3.000.														Day2
														Scheffea
Day2														KnockdownCul3	N	Subset for alpha = 0.05
Scheffea																1	2	3
KnockdownCul3	N	Subset for alpha = 0.05												SiCul3#2	3	1.35033
		1	2	3										SiCul3#1	3		2.60833
SiCul3#2	3	1.44933												SiNC	3			3.85067
SiCul3#1	3		2.137											Sig.		1	1	1
SiNC	3			5.07833										Means for groups in homogeneous subsets are displayed.
Sig.		1	1	1										a. Uses Harmonic Mean Sample Size = 3.000.
Means for groups in homogeneous subsets are displayed.
a. Uses Harmonic Mean Sample Size = 3.000.														Day3
														Scheffea
Day3														KnockdownCul3	N	Subset for alpha = 0.05
Scheffea																1	2	3
KnockdownCul3	N	Subset for alpha = 0.05												SiCul3#2	3	2.47
		1	2	3										SiCul3#1	3		3.78533
SiCul3#2	3	2.48767												SiNC	3			5.36933
SiCul3#1	3		3.89633											Sig.		1	1	1
SiNC	3			7.09667										Means for groups in homogeneous subsets are displayed.
Sig.		1	1	1										a. Uses Harmonic Mean Sample Size = 3.000.
Means for groups in homogeneous subsets are displayed.
a. Uses Harmonic Mean Sample Size = 3.000.

## Sheet: ANOVA-post hoc Fig2C
Colony formation assay after knockdwon Cul3
		number of colony
		well 1	well 2	well 3	Average	SD	p value
KKU-213A-FR	siNC	148	147	143	146	2.64575
	siCul3#1	98	102	86	95.3333	8.32666	0.000552436
	siCul3#2	55	54	67	58.6667	7.23418	3.96566e-05
KKU-213A-GR	siNC	123	136	126	128.333	6.80686
	siCul3#1	88	95	83	88.6667	6.02771	0.00164358
	siCul3#2	69	68	71	69.3333	1.52753	0.000126354
Statistic analysis
Descriptives
		N	Mean	Std. Deviation	Std. Error	95% Confidence Interval for Mean		Minimum	Maximum
						Lower Bound	Upper Bound
KKU213AFR	SiNC	3	146	2.64575	1.52753	139.428	152.572	143	148
	SiCul#1	3	95.3333	8.32666	4.8074	74.6488	116.018	86	102
	SiCul#2	3	58.6667	7.23418	4.17665	40.696	76.6374	54	67
	Total	9	100	38.3992	12.7997	70.4837	129.516	54	148
KKU213AGR	SiNC	3	128.333	6.80686	3.92994	111.424	145.243	123	136
	SiCul#1	3	88.6667	6.02771	3.4801	73.693	103.64	83	95
	SiCul#2	3	69.3333	1.52753	0.881917	65.5388	73.1279	68	71
	Total	9	95.4444	26.4533	8.81777	75.1106	115.778	68	136
Tests of Homogeneity of Variances
		Levene Statistic	df1	df2	Sig.
KKU213AFR	Based on Mean	2.53441	2	6	0.159276
	Based on Median	0.375969	2	6	0.701727
	Based on Median and with adjusted df	0.375969	2	4.37892	0.70683
	Based on trimmed mean	2.21393	2	6	0.190489
KKU213AGR	Based on Mean	2.30538	2	6	0.180807
	Based on Median	0.752066	2	6	0.511155
	Based on Median and with adjusted df	0.752066	2	3.76811	0.531092
	Based on trimmed mean	2.16311	2	6	0.196169
ANOVA
		Sum of Squares	df	Mean Square	F	Sig.
KKU213AFR	Between Groups	11538.7	2	5769.33	134.518	1.03821e-05	***
	Within Groups	257.333	6	42.8889
	Total	11796	8
KKU213AGR	Between Groups	5428.22	2	2714.11	95.7922	2.80025e-05	***
	Within Groups	170	6	28.3333
	Total	5598.22	8
Post Hoc Tests
Multiple Comparisons
Scheffe
Dependent Variable	(I) knockdowncul3	(J) knockdowncul3	Mean Difference (I-J)	Std. Error	Sig.	95% Confidence Interval
						Lower Bound	Upper Bound
KKU213AFR	SiNC	SiCul#1	50.66667*	5.3472	0.000245808	33.5168	67.8165	***
		SiCul#2	87.33333*	5.3472	1.06452e-05	70.1835	104.483	***
	SiCul#1	SiNC	-50.66667*	5.3472	0.000245808	-67.8165	-33.5168
		SiCul#2	36.66667*	5.3472	0.00144916	19.5168	53.8165	**
	SiCul#2	SiNC	-87.33333*	5.3472	1.06452e-05	-104.483	-70.1835
		SiCul#1	-36.66667*	5.3472	0.00144916	-53.8165	-19.5168
KKU213AGR	SiNC	SiCul#1	39.66667*	4.34613	0.000303319	25.7275	53.6058	***
		SiCul#2	59.00000*	4.34613	3.13486e-05	45.0608	72.9392	***
	SiCul#1	SiNC	-39.66667*	4.34613	0.000303319	-53.6058	-25.7275
		SiCul#2	19.33333*	4.34613	0.0125947	5.39416	33.2725	*
	SiCul#2	SiNC	-59.00000*	4.34613	3.13486e-05	-72.9392	-45.0608
		SiCul#1	-19.33333*	4.34613	0.0125947	-33.2725	-5.39416
*. The mean difference is significant at the 0.05 level.
Homogeneous Subsets
KKU213AFR
Scheffea
knockdowncul3	N	Subset for alpha = 0.05
		1	2	3
SiCul#2	3	58.6667
SiCul#1	3		95.3333
SiNC	3			146
Sig.		1	1	1
Means for groups in homogeneous subsets are displayed.
a. Uses Harmonic Mean Sample Size = 3.000.
KKU213AGR
Scheffea
knockdowncul3	N	Subset for alpha = 0.05
		1	2	3
SiCul#2	3	69.3333
SiCul#1	3		88.6667
SiNC	3			128.333
Sig.		1	1	1
Means for groups in homogeneous subsets are displayed.
a. Uses Harmonic Mean Sample Size = 3.000.

## Sheet: ANOVA-post hoc Fig2D
Cell migration assay												Cell Invasion assay
		Field-1	Field-2	Field-3	Field-4	Field-5	Average	SD	p value					Field-1	Field-2	Field-3	Field-4	Field-5	Average	SD	p value
KKU-213A-FR	siNC	309	305	270	310	261	291	23.569				KKU-213A-FR	siNC	508	524	497	505	505	507.8	9.93479
	siCul3#1	103	141	109	126	117	119.2	14.9399	7.48114e-07				siCul3#1	278	257	194	192	217	227.6	38.4487	2.60286e-07
	siCul3#2	114	134	163	126	168	141	23.5372	8.05958e-06				siCul3#2	384	373	321	275	400	350.6	51.5975	0.000154343
KKU-213A-GR	siNC	246	265	276	254	271	262.4	12.3004				KKU-213A-GR	siNC	576	601	590	573	642	596.4	27.8622
	siCul3#1	107	117	83	102	97	101.2	12.5778	3.36931e-08				siCul3#1	268	216	242	228	236	238	19.3907	1.10248e-08
	siCul3#2	139	159	123	120	118	131.8	17.3118	7.54557e-07				siCul3#2	295	202	286	235	250	253.6	38.0303	2.05984e-07
Statistic analysis												Statistic analysis
Descriptives												Descriptives
		N	Mean	Std. Deviation	Std. Error	95% Confidence Interval for Mean		Minimum	Maximum					N	Mean	Std. Deviation	Std. Error	95% Confidence Interval for Mean		Minimum	Maximum
						Lower Bound	Upper Bound											Lower Bound	Upper Bound
KKU213AFR	SiNC	5	291	23.569	10.5404	261.735	320.265	261	310			KKU213AFR	SiNC	5	507.8	9.93479	4.44297	495.464	520.136	497	524
	SiCul#1	5	119.2	14.9399	6.68132	100.65	137.75	103	141				SiCul#1	5	227.6	38.4487	17.1948	179.86	275.34	192	278
	SiCul#2	5	141	23.5372	10.5262	111.775	170.225	114	168				SiCul#2	5	350.6	51.5975	23.0751	286.533	414.667	275	400
	Total	15	183.733	81.4226	21.0232	138.643	228.824	103	310				Total	15	362	123.697	31.9383	293.499	430.501	192	524
KKU213AGR	SiNC	5	262.4	12.3004	5.50091	247.127	277.673	246	276			KKU213AGR	SiNC	5	596.4	27.8622	12.4603	561.805	630.995	573	642
	SiCul#1	5	101.2	12.5778	5.62494	85.5827	116.817	83	117				SiCul#1	5	238	19.3907	8.67179	213.923	262.077	216	268
	SiCul#2	5	131.8	17.3118	7.74209	110.305	153.295	118	159				SiCul#2	5	253.6	38.0303	17.0076	206.379	300.821	202	295
	Total	15	165.133	73.5497	18.9904	124.403	205.864	83	276				Total	15	362.667	173.357	44.7606	266.665	458.669	202	642
Tests of Homogeneity of Variances												Tests of Homogeneity of Variances
		Levene Statistic	df1	df2	Sig.									Levene Statistic	df1	df2	Sig.
KKU213AFR	Based on Mean	2.18584	2	12	0.155071							KKU213AFR	Based on Mean	7.187	2	12	0.00887219
	Based on Median	0.345704	2	12	0.714543								Based on Median	1.94061	2	12	0.186117
	Based on Median and with adjusted df	0.345704	2	8.8242	0.716893								Based on Median and with adjusted df	1.94061	2	6.8009	0.215379
	Based on trimmed mean	2.0768	2	12	0.168063								Based on trimmed mean	6.64208	2	12	0.0114287
KKU213AGR	Based on Mean	0.648718	2	12	0.540107							KKU213AGR	Based on Mean	1.24192	2	12	0.323433
	Based on Median	0.132317	2	12	0.877324								Based on Median	0.961215	2	12	0.410013
	Based on Median and with adjusted df	0.132317	2	8.09335	0.87792								Based on Median and with adjusted df	0.961215	2	10.6539	0.413255
	Based on trimmed mean	0.585929	2	12	0.571749								Based on trimmed mean	1.26321	2	12	0.317787
ANOVA												ANOVA
		Sum of Squares	df	Mean Square	F	Sig.								Sum of Squares	df	Mean Square	F	Sig.
KKU213AFR	Between Groups	87484.1	2	43742.1	98.4664	3.58961e-08	***					KKU213AFR	Between Groups	197255	2	98627.4	69.7951	2.46072e-07	***
	Within Groups	5330.8	12	444.233									Within Groups	16957.2	12	1413.1
	Total	92814.9	14										Total	214212	14
KKU213AGR	Between Groups	73296.9	2	36648.5	180.475	1.10964e-09	***					KKU213AGR	Between Groups	410343	2	205171	236.864	2.27368e-10	***
	Within Groups	2436.8	12	203.067									Within Groups	10394.4	12	866.2
	Total	75733.7	14										Total	420737	14
Post Hoc Tests												Post Hoc Tests
Multiple Comparisons												Multiple Comparisons
Scheffe												Scheffe
Dependent Variable	(I) knockdowncul3	(J) knockdowncul3	Mean Difference (I-J)	Std. Error	Sig.	95% Confidence Interval						Dependent Variable	(I) knockdowncul3	(J) knockdowncul3	Mean Difference (I-J)	Std. Error	Sig.	95% Confidence Interval
						Lower Bound	Upper Bound											Lower Bound	Upper Bound
KKU213AFR	SiNC	SiCul#1	171.80000*	13.3302	9.35563e-08	134.641	208.959	***				KKU213AFR	SiNC	SiCul#1	280.20000*	23.7748	2.52898e-07	213.926	346.474	***
		SiCul#2	150.00000*	13.3302	4.20806e-07	112.841	187.159	***						SiCul#2	157.20000*	23.7748	9.97834e-05	90.926	223.474	***
	SiCul#1	SiNC	-171.80000*	13.3302	9.35563e-08	-208.959	-134.641						SiCul#1	SiNC	-280.20000*	23.7748	2.52898e-07	-346.474	-213.926
		SiCul#2	-21.8	13.3302	0.299026	-58.9589	15.3589	ns						SiCul#2	-123.00000*	23.7748	0.000879847	-189.274	-56.726	***
	SiCul#2	SiNC	-150.00000*	13.3302	4.20806e-07	-187.159	-112.841						SiCul#2	SiNC	-157.20000*	23.7748	9.97834e-05	-223.474	-90.926
		SiCul#1	21.8	13.3302	0.299026	-15.3589	58.9589							SiCul#1	123.00000*	23.7748	0.000879847	56.726	189.274
KKU213AGR	SiNC	SiCul#1	161.20000*	9.01258	2.23329e-09	136.077	186.323	***				KKU213AGR	SiNC	SiCul#1	358.40000*	18.614	9.50018e-10	306.512	410.288	***
		SiCul#2	130.60000*	9.01258	2.49545e-08	105.477	155.723	***						SiCul#2	342.80000*	18.614	1.59244e-09	290.912	394.688	***
	SiCul#1	SiNC	-161.20000*	9.01258	2.23329e-09	-186.323	-136.077						SiCul#1	SiNC	-358.40000*	18.614	9.50018e-10	-410.288	-306.512
		SiCul#2	-30.60000*	9.01258	0.0176038	-55.7233	-5.47673	*						SiCul#2	-15.6	18.614	0.710849	-67.4879	36.2879	ns
	SiCul#2	SiNC	-130.60000*	9.01258	2.49545e-08	-155.723	-105.477						SiCul#2	SiNC	-342.80000*	18.614	1.59244e-09	-394.688	-290.912
		SiCul#1	30.60000*	9.01258	0.0176038	5.47673	55.7233							SiCul#1	15.6	18.614	0.710849	-36.2879	67.4879
*. The mean difference is significant at the 0.05 level.												*. The mean difference is significant at the 0.05 level.
Homogeneous Subsets												Homogeneous Subsets
KKU213AFR												KKU213AFR
Scheffea												Scheffea
knockdowncul3	N	Subset for alpha = 0.05										knockdowncul3	N	Subset for alpha = 0.05
		1	2											1	2	3
SiCul#1	5	119.2										SiCul#1	5	227.6
SiCul#2	5	141										SiCul#2	5		350.6
SiNC	5		291									SiNC	5			507.8
Sig.		0.299026	1									Sig.		1	1	1
Means for groups in homogeneous subsets are displayed.												Means for groups in homogeneous subsets are displayed.
a. Uses Harmonic Mean Sample Size = 5.000.												a. Uses Harmonic Mean Sample Size = 5.000.
KKU213AGR												KKU213AGR
Scheffea												Scheffea
knockdowncul3	N	Subset for alpha = 0.05										knockdowncul3	N	Subset for alpha = 0.05
		1	2	3										1	2
SiCul#1	5	101.2										SiCul#1	5	238
SiCul#2	5		131.8									SiCul#2	5	253.6
SiNC	5			262.4								SiNC	5		596.4
Sig.		1	1	1								Sig.		0.710849	1
Means for groups in homogeneous subsets are displayed.												Means for groups in homogeneous subsets are displayed.
a. Uses Harmonic Mean Sample Size = 5.000.												a. Uses Harmonic Mean Sample Size = 5.000.
